# Supplementary material for: The first structurally characterized cationic lanthanide–alkyl complexesElectronic supplementary information (ESI) available: experimental and spectroscopic details. See http://www.rsc.org/suppdata/cc/b2/b201613n/
Source: Royal Society of Chemistry journal article supplement (doi:10.1039/b201613n), 2002-04-02
Supplement: b201613n.doc [file b201613n.doc]

**Supplementary Material (ESI) for Chemical Communications**

**This journal is © The Royal Society of Chemistry 2002**

**[Lu(CH2SiMe3)2(12-crown-4)(THF)]+[BPh3(CH2SiMe3)]-**

A solution of Lu(CH2SiMe3)3(THF)2 (200 mg, 344 µmol) and BPh3 (83 mg, 344 µmol) in THF (1 mL) was stirred for 20 min at 25 °C, treated with 12-crown-4 (55 L, 344 µmol), and the mixture stirred for 15 min. After evaporation of the solvent, pentane (3 mL) was added to precipitate a colorless powder, which was filtered and washed with pentane (3 x 2 mL); yield 259 mg (81 %). 1H NMR (CD2Cl2, 25 °C) : -1.12 (s, 2 x 2 H, LuCH2), -0.47 (s, 9 H, BCH2SiC*H*3), -0.11 (s, 2 x 9 H, LuCH2SiC*H*3), 0.17 (q, 2*J*BH = 4.7 Hz, 2 H, BCH2), 2.03 (m, 4 H, -CH2, THF), 3,24, 3.65 (br m, 8 H, OCH), 4.04 (m, 4 H, -CH2, THF), 6.86 (t, 3*J*HH = 7.1 Hz, 3 H, 4- Ph), 7.02 (t, 3*J*HH = 7.4 Hz, 3 x 2 H, 3- Ph), 7.46 (br 3 x 2 H, 2- Ph). 13C{1H} NMR (CD2Cl2, 25 °C) : 2.3 (BCH2Si*C*H3), 4.0 (LuCH2Si*C*H3), 25.7 (-CH2, THF), 39.5 (LuCH2), 68.0 (OCH), 72.0 (-CH2, THF), 122.0 (4- Ph), 125.9 (3- Ph), 135.4 (2- Ph), 167.6 (q, 1*J*BC = 48.3 Hz, 1- Ph). The signal of the BCH2 group is not detected. 11B{1H} NMR (THF-*d*8, 25 °C) : -10.4. Anal. Calcd for C42H72BLuO5Si3: C, 54.42; H, 7.83. Found: C, 54.06; H, 8.06.

**[Lu(CH2SiMe3)2([15]-crown-5)]+[B(CH2SiMe3)Ph3]-**

A solution of Lu(CH2SiMe3)3(THF)2 (200 mg, 344 µmol) and BPh3 (83 mg, 344 µmol) in THF (1 mL) was stirred for 20 min at 25 °C, treated with [15]-crown-5 (75 L, 344 µmol), and the mixture stirred for 15 min. After evaporation of the solvent, pentane (3 mL) was added to give a colorless powder which was washed with pentane (3 x 2 mL); yield: 284 mg (92 %). 1H NMR (CD2Cl2, 25 °C) : -1.17 (s, 2 x 2 H, LuCH2), -0.44 (s, 9 H, BCH2SiC*H*3), -0.07 (s, 2 x 9 H, LuCH2SiC*H*3), 0.18 (br, 2 H, BCH2), 3,45, 3.75 (br m, 10 H, OCH), 6.87 (t, 3*J*HH = 7.0 Hz, 3 H, 4- Ph), 7.03 (t, 3*J*HH = 7.1 Hz, 3 x 2 H, 3- Ph), 7.45 (br 3 x 2 H, 2- Ph). 13C{1H} NMR (CD2Cl2, 25 °C) : 2.4 (BCH2Si*C*H3), 4.2 (LuCH2Si*C*H3), 36.7 (LuCH2), 69.2 (OCH), 122.0 (4- Ph), 126.0 (3- Ph), 135.3 (2- Ph), 167.5 (q, 1*J*BC = 48.3 Hz, 1- Ph). The signal of the BCH2 group was not detected. 11B{1H} NMR (THF-*d*8, 25 °C) : -10.4. Anal. Calcd for C40H68BLuO5Si3: C, 53.44; H, 7.56. Found: C, 52.56; H, 8.32.

**[Lu(CH2SiMe3)2(18-crown-6)]+[BPh3(CH2SiMe3)]-**

A solution of Lu(CH2SiMe3)3(THF)2 (200 mg, 344 µmol) and BPh3 (83 mg, 344 µmol) in THF (1 mL) was stirred for 1.5 h at 25 °C, treated with 18-crown-6 (91 mg, 344 µmol) and the mixture stirred until all solids completely dissolved. After evaporation of the solvent, pentane (3 mL) was added to precipitate a colorless powder, which was filtered and washed with pentane (3 x 2 mL); yield 314 mg (97 %). 1H NMR (THF-*d*8, 25 °C) : -1.30 (s, 2 x 2 H, LuCH2), -0.48 (s, 9 H, BCH2SiC*H*3), -0.13 (s, 2 x 9 H, LuCH2SiC*H*3), 0.20 (br, 2 H, BCH2), 3,59, 3.82 (br, 12 H, OCH), 6.74 (t, 3*J*HH = 6.8 Hz, 3 H, 4- Ph), 6.91 (t, 3*J*HH = 7.0 Hz, 3 x 2 H, 3- Ph), 7.43 (br 3 x 2 H, 2- Ph). 13C{1H} NMR (THF-*d*8, 25 °C) : 2.7 (BCH2Si*C*H3), 4.5 (LuCH2Si*C*H3), 31.8 (LuCH2), 71.4 (OCH), 121.9 (4- Ph), 126.0 (3- Ph), 135.8 (2- Ph), 168.0 (q, 1*J*BC = 48.6 Hz, 1- Ph). The signal of the BCH2 group is not detected. 11B{1H} NMR (THF-*d*8, 25 °C) : -10.4. Anal. Calcd for C42H72BLuO6Si3: C, 53.49; H, 7.70. Found: C, 52.52; H, 8.33.

**[Y(CH2SiMe3)2(12-crown-4)(THF)]+[BPh3(CH2SiMe3)]-**

A solution of Y(CH2SiMe3)3(THF)2 (170 mg, 344 µmol) and BPh3 (83 mg, 344 µmol) in THF (1 mL) was stirred for 20 min at 25 °C, treated with 12-crown-4 (55 L mg, 344 µmol), and the mixture stirred for 15 min. After evaporation of the solvent, pentane (3 mL) was added to precipitate a colorless powder, which was filtered and washed with pentane (3 x 2 mL); yield 270 mg (93 %). 1H NMR (CD2Cl2, 25 °C) : -0.86 (d, 2*J*YH = 3.2 Hz, 2 x 2 H, YCH2), -0.46 (s, 9 H, BCH2SiC*H*3), -0.11 (s, 2 x 9 H, YCH2SiC*H*3), 0.18 (br, 2 H, BCH2), 2.03 (m, 4 H, -CH2, THF), 3,27, 3.65 (br m, 8 H, OCH), 4.04 (m, 4 H, -CH2, THF), 6.87 (t, 3*J*HH = 7.1 Hz, 3 H, 4- Ph), 7.03 (t, 3*J*HH = 7.2 Hz, 3 x 2 H, 3- Ph), 7.47 (br 3 x 2 H, 2- Ph). 13C{1H} NMR (CD2Cl2, 25 °C) : 2.3 (BCH2Si*C*H3), 3.9 (YCH2Si*C*H3), 25.7 (-CH2, THF), 39.8 (d, 1*J*YC = 41.0 Hz, YCH2), 67.9 (OCH), 71.6 (-CH2, THF), 122.0 (4- Ph), 126.0 (3- Ph), 135.4 (2- Ph), 167.6 (q, 1*J*BC = 48.3 Hz, 1- Ph). The signal of the BCH2 group is not detected. 11B{1H} NMR (THF-*d*8, 25 °C) : -10.4.
